# Supplementary material for: Screening the Medicines for Malaria Venture "Malaria Box" against the Plasmodium falciparum Aminopeptidases, M1, M17 and M18
Source: PubMed Central journal article supplement (PMC4336144; doi:10.1371/journal.pone.0115859), 2015-02-20
Supplement: pone.0115859.s001.pdf [file pone.0115859.s001.pdf]

| Activity (PIA-M1 and/or PIA-M17) |     |        |                    |             | Activity (PIA-M1 and/or PIA-M17) |           |     |        |                    | Activity (PIA-M1 and/or PIA-M17) |      |           |     |        |                    |             |      |
|----------------------------------|-----|--------|--------------------|-------------|----------------------------------|-----------|-----|--------|--------------------|----------------------------------|------|-----------|-----|--------|--------------------|-------------|------|
| COMPOUND                         | Set | PIA-M1 | Activity (PIA-M17) | PLATE       | WELL                             | COMPOUND  | Set | PIA-M1 | Activity (PIA-M17) | PLATE                            | WELL | COMPOUND  | Set | PIA-M1 | Activity (PIA-M17) | PLATE       | WELL |
| MMV019066                        | D   | UC     | UC                 | MMV_PLATE_A | A02                              | MMV019746 | D   | UC     | UC                 | MMV_PLATE_B                      | F06  | MMV006787 | P   | UC     | UC                 | MMV_PLATE_D | C10  |
| MMV665944                        | P   | UC     | UC                 | MMV_PLATE_A | A03                              | MMV019064 | D   | UC     | UC                 | MMV_PLATE_B                      | F07  | MMV665794 | P   | UC     | UC                 | MMV_PLATE_D | C11  |
| MMV396680                        | P   | UC     | UC                 | MMV_PLATE_A | A04                              | MMV019144 | D   | UC     | UC                 | MMV_PLATE_B                      | F08  | MMV000917 | P   | UC     | UC                 | MMV_PLATE_D | D02  |
| MMV666601                        | P   | UC     | UC                 | MMV_PLATE_A | A05                              | MMV665803 | D   | UC     | UC                 | MMV_PLATE_B                      | F09  | MMV666125 | P   | UC     | UC                 | MMV_PLATE_D | D03  |
| MMV000294                        | P   | UC     | UC                 | MMV_PLATE_A | A06                              | MMV665857 | D   | UC     | UC                 | MMV_PLATE_B                      | F10  | MMV665987 | P   | UC     | UC                 | MMV_PLATE_D | D04  |
| MMV011259                        | D   | UC     | UC                 | MMV_PLATE_A | A07                              | MMV666071 | D   | UC     | UC                 | MMV_PLATE_B                      | F11  | MMV007574 | P   | UC     | UC                 | MMV_PLATE_D | D05  |
| MMV019406                        | P   | UC     | UC                 | MMV_PLATE_A | A08                              | MMV019780 | D   | UC     | UC                 | MMV_PLATE_B                      | G02  | MMV000326 | P   | UC     | UC                 | MMV_PLATE_D | D06  |
| MMV006278                        | D   | UC     | UC                 | MMV_PLATE_A | A09                              | MMV666093 | D   | UC     | UC                 | MMV_PLATE_B                      | G03  | MMV000604 | P   | UC     | UC                 | MMV_PLATE_D | D07  |
| MMV666688                        | P   | UC     | UC                 | MMV_PLATE_A | A10                              | MMV665953 | D   | UC     | UC                 | MMV_PLATE_B                      | G04  | MMV007557 | P   | UC     | UC                 | MMV_PLATE_D | D08  |
| MMV019110                        | D   | UC     | UC                 | MMV_PLATE_A | A11                              | MMV000648 | D   | UC     | UC                 | MMV_PLATE_B                      | G05  | MMV000699 | P   | UC     | UC                 | MMV_PLATE_D | D09  |
| MMV005427                        | D   | UC     | UC                 | MMV_PLATE_A | B02                              | MMV019662 | D   | UC     | UC                 | MMV_PLATE_B                      | G06  | MMV009127 | P   | UC     | UC                 | MMV_PLATE_D | D10  |
| MMV396672                        | D   | UC     | UC                 | MMV_PLATE_A | B07                              | MMV007511 | D   | UC     | UC                 | MMV_PLATE_B                      | G07  | MMV665786 | P   | UC     | UC                 | MMV_PLATE_D | D11  |
| MMV666062                        | P   | UC     | UC                 | MMV_PLATE_A | B03                              | MMV007617 | D   | UC     | UC                 | MMV_PLATE_B                      | G08  | MMV006250 | P   | UC     | UC                 | MMV_PLATE_D | E02  |
| MMV020885                        | P   | UC     | UC                 | MMV_PLATE_A | B04                              | MMV665796 | D   | UC     | UC                 | MMV_PLATE_B                      | G09  | MMV666079 | P   | UC     | UC                 | MMV_PLATE_D | E03  |
| MMV000570                        | P   | UC     | UC                 | MMV_PLATE_A | B05                              | MMV665906 | D   | R      | UC                 | MMV_PLATE_B                      | G10  | MMV665969 | P   | R      | UC                 | MMV_PLATE_D | E04  |
| MMV020439                        | D   | UC     | UC                 | MMV_PLATE_A | B06                              | MMV665954 | D   | UC     | UC                 | MMV_PLATE_B                      | G11  | MMV000304 | P   | UC     | UC                 | MMV_PLATE_D | E05  |
| MMV396672                        | D   | UC     | UC                 | MMV_PLATE_A | B07                              | MMV019730 | D   | UC     | UC                 | MMV_PLATE_B                      | H02  | MMV000443 | P   | UC     | UC                 | MMV_PLATE_D | E06  |
| MMV019871                        | D   | UC     | UC                 | MMV_PLATE_A | B08                              | MMV666072 | D   | UC     | UC                 | MMV_PLATE_B                      | H03  | MMV666804 | P   | UC     | UC                 | MMV_PLATE_D | E07  |
| MMV085553                        | P   | UC     | UC                 | MMV_PLATE_A | B09                              | MMV666070 | D   | UC     | UC                 | MMV_PLATE_B                      | H04  | MMV008455 | P   | UC     | UC                 | MMV_PLATE_D | E08  |
| MMV008416                        | P   | UC     | UC                 | MMV_PLATE_A | B10                              | MMV142383 | D   | UC     | UC                 | MMV_PLATE_B                      | H05  | MMV007199 | P   | UC     | UC                 | MMV_PLATE_D | E09  |
| MMV665874                        | D   | UC     | UC                 | MMV_PLATE_A | B11                              | MMV000788 | D   | UC     | UC                 | MMV_PLATE_B                      | H06  | MMV085471 | P   | UC     | UC                 | MMV_PLATE_D | E10  |
| MMV006203                        | P   | UC     | UC                 | MMV_PLATE_A | C02                              | MMV000561 | D   | UC     | UC                 | MMV_PLATE_B                      | H07  | MMV665797 | P   | UC     | UC                 | MMV_PLATE_D | E11  |
| MMV020549                        | D   | UC     | UC                 | MMV_PLATE_A | C04                              | MMV000248 | D   | UC     | UC                 | MMV_PLATE_B                      | H08  | MMV006513 | P   | UC     | UC                 | MMV_PLATE_D | F02  |
| MMV001246                        | P   | UC     | UC                 | MMV_PLATE_A | C05                              | MMV665876 | D   | UC     | UC                 | MMV_PLATE_B                      | H09  | MMV666095 | P   | UC     | UC                 | MMV_PLATE_D | F03  |
| MMV666607                        | P   | UC     | UC                 | MMV_PLATE_A | C06                              | MMV665890 | D   | UC     | UC                 | MMV_PLATE_B                      | H10  | MMV665943 | P   | UC     | UC                 | MMV_PLATE_D | F04  |
| MMV665915                        | D   | UC     | UC                 | MMV_PLATE_A | C07                              | MMV666116 | D   | UC     | UC                 | MMV_PLATE_B                      | H11  | MMV019555 | P   | UC     | UC                 | MMV_PLATE_D | F05  |
| MMV007695                        | P   | UC     | UC                 | MMV_PLATE_A | C08                              | MMV006913 | D   | UC     | UC                 | MMV_PLATE_C                      | A02  | MMV019741 | P   | UC     | UC                 | MMV_PLATE_D | F06  |
| MMV000448                        | P   | UC     | UC                 | MMV_PLATE_A | C09                              | MMV008127 | D   | UC     | UC                 | MMV_PLATE_C                      | A03  | MMV019690 | P   | UC     | UC                 | MMV_PLATE_D | F07  |
| MMV020500                        | D   | UC     | UC                 | MMV_PLATE_A | C10                              | MMV403679 | D   | R      | UC                 | MMV_PLATE_C                      | A04  | MMV000621 | P   | UC     | UC                 | MMV_PLATE_D | F08  |
| MMV665878                        | P   | UC     | UC                 | MMV_PLATE_A | C11                              | MMV305841 | D   | UC     | UC                 | MMV_PLATE_C                      | A05  | MMV006173 | P   | UC     | UC                 | MMV_PLATE_D | F09  |
| MMV666101                        | P   | UC     | UC                 | MMV_PLATE_A | D02                              | MMV019700 | D   | UC     | UC                 | MMV_PLATE_C                      | A06  | MMV019241 | P   | R      | UC                 | MMV_PLATE_D | F10  |
| MMV666596                        | P   | UC     | UC                 | MMV_PLATE_A | D03                              | MMV019670 | D   | UC     | UC                 | MMV_PLATE_C                      | A07  | MMV665783 | P   | UC     | UC                 | MMV_PLATE_D | F11  |
| MMV396679                        | P   | UC     | UC                 | MMV_PLATE_A | D04                              | MMV001344 | D   | UC     | UC                 | MMV_PLATE_C                      | A08  | MMV000787 | P   | UC     | UC                 | MMV_PLATE_D | G02  |
| MMV396797                        | D   | UC     | UC                 | MMV_PLATE_A | D05                              | MMV011795 | D   | UC     | UC                 | MMV_PLATE_C                      | A09  | MMV666106 | P   | UC     | UC                 | MMV_PLATE_D | G03  |
| MMV008138                        | D   | UC     | UC                 | MMV_PLATE_A | D06                              | MMV019124 | D   | UC     | UC                 | MMV_PLATE_C                      | A10  | MMV666022 | P   | R      | UC                 | MMV_PLATE_D | G04  |
| MMV665916                        | D   | UC     | UC                 | MMV_PLATE_A | D07                              | MMV006767 | D   | UC     | UC                 | MMV_PLATE_C                      | A11  | MMV498479 | P   | UC     | UC                 | MMV_PLATE_D | G05  |
| MMV020780                        | P   | UC     | UC                 | MMV_PLATE_A | D08                              | MMV007808 | D   | UC     | UC                 | MMV_PLATE_C                      | B02  | MMV007596 | P   | UC     | UC                 | MMV_PLATE_D | G06  |
| MMV666691                        | P   | R      | UC                 | MMV_PLATE_A | D09                              | MMV019017 | D   | UC     | UC                 | MMV_PLATE_C                      | B03  | MMV000617 | P   | UC     | UC                 | MMV_PLATE_D | G07  |
| MMV665785                        | P   | UC     | UC                 | MMV_PLATE_A | D10                              | MMV396681 | D   | UC     | UC                 | MMV_PLATE_C                      | B04  | MMV006764 | P   | UC     | UC                 | MMV_PLATE_D | G08  |
| MMV665831                        | P   | R      | UC                 | MMV_PLATE_A | D11                              | MMV006587 | D   | UC     | UC                 | MMV_PLATE_C                      | B05  | MMV007275 | P   | UC     | UC                 | MMV_PLATE_D | G09  |
| MMV011099                        | D   | UC     | UC                 | MMV_PLATE_A | E02                              | MMV019202 | D   | UC     | UC                 | MMV_PLATE_C                      | B06  | MMV007273 | P   | R      | UC                 | MMV_PLATE_D | G10  |
| MMV000642                        | P   | UC     | UC                 | MMV_PLATE_A | E03                              | MMV000948 | D   | UC     | UC                 | MMV_PLATE_C                      | B07  | MMV666026 | P   | UC     | UC                 | MMV_PLATE_D | G11  |
| MMV666600                        | P   | UC     | UC                 | MMV_PLATE_A | E04                              | MMV002275 | D   | UC     | UC                 | MMV_PLATE_C                      | B08  | MMV665923 | P   | UC     | UC                 | MMV_PLATE_D | H02  |
| MMV006172                        | P   | UC     | UC                 | MMV_PLATE_A | E05                              | MMV019918 | D   | UC     | UC                 | MMV_PLATE_C                      | B09  | MMV666025 | P   | UC     | UC                 | MMV_PLATE_D | H03  |
| MMV006309                        | P   | R      | UC                 | MMV_PLATE_A | E06                              | MMV075490 | D   | UC     | UC                 | MMV_PLATE_C                      | B10  | MMV666060 | P   | UC     | UC                 | MMV_PLATE_D | H04  |
| MMV006087                        | D   | UC     | UC                 | MMV_PLATE_A | E07                              | MMV396633 | D   | UC     | UC                 | MMV_PLATE_C                      | B11  | MMV666597 | P   | UC     | UC                 | MMV_PLATE_D | H05  |
| MMV020492                        | D   | UC     | UC                 | MMV_PLATE_A | E08                              | MMV007374 | D   | UC     | UC                 | MMV_PLATE_C                      | C02  | MMV007224 | P   | UC     | UC                 | MMV_PLATE_D | H06  |
| MMV006455                        | D   | UC     | UC                 | MMV_PLATE_A | E09                              | MMV396719 | D   | UC     | UC                 | MMV_PLATE_C                      | C03  | MMV020912 | P   | UC     | UC                 | MMV_PLATE_D | H07  |
| MMV665782                        | D   | UC     | UC                 | MMV_PLATE_A | E10                              | MMV396744 | D   | UC     | UC                 | MMV_PLATE_C                      | C04  | MMV007181 | P   | UC     | UC                 | MMV_PLATE_D | H08  |
| MMV665876                        | P   | UC     | UC                 | MMV_PLATE_A | E11                              | MMV006708 | D   | UC     | UC                 | MMV_PLATE_C                      | C05  | MMV007113 | P   | UC     | UC                 | MMV_PLATE_D | H09  |
| MMV666023                        | P   | R      | UC                 | MMV_PLATE_A | F02                              | MMV009108 | D   | UC     | UC                 | MMV_PLATE_C                      | C06  | MMV007228 | P   | R      | UC                 | MMV_PLATE_D | H10  |
| MMV009063                        | D   | UC     | UC                 | MMV_PLATE_A | F03                              | MMV020700 | D   | UC     | UC                 | MMV_PLATE_C                      | C07  | MMV665972 | P   | UC     | UC                 | MMV_PLATE_D | H11  |
| MMV006558                        | P   | UC     | UC                 | MMV_PLATE_A | F04                              | MMV007906 | D   | UC     | UC                 | MMV_PLATE_C                      | C08  | MMV073843 | P   | UC     | UC                 | MMV_PLATE_E | A02  |
| MMV007160                        | P   | UC     | UC                 | MMV_PLATE_A | F05                              | MMV008270 | D   | UC     | UC                 | MMV_PLATE_C                      | C09  | MMV006303 | P   | UC     | UC                 | MMV_PLATE_E | A03  |
| MMV006429                        | D   | UC     | UC                 | MMV_PLATE_A | F06                              | MMV019127 | D   | UC     | UC                 | MMV_PLATE_C                      | C10  | MMV67490  | P   | UC     | UC                 | MMV_PLATE_E | A04  |
| MMV396703                        | D   | UC     | UC                 | MMV_PLATE_A | F07                              | MMV396794 | D   | UC     | UC                 | MMV_PLATE_C                      | C11  | MMV67492  | P   | UC     | UC                 | MMV_PLATE_E | A05  |
| MMV006937                        | D   | UC     | UC                 | MMV_PLATE_A | F08                              | MMV396736 | D   | UC     | UC                 | MMV_PLATE_C                      | D02  | MMV019881 | P   | UC     | UC                 | MMV_PLATE_E | A06  |
| MMV085203                        | P   | UC     | UC                 | MMV_PLATE_A | F09                              | MMV306025 | D   | UC     | UC                 | MMV_PLATE_C                      | D03  | MMV000478 | P   | UC     | UC                 | MMV_PLATE_E | A07  |
| MMV665820                        | D   | UC     | UC                 | MMV_PLATE_A | F10                              | MMV056726 | D   | UC     | UC                 | MMV_PLATE_C                      | D04  | MMV020403 | P   | UC     | UC                 | MMV_PLATE_E | A08  |
| MMV665841                        | P   | UC     | UC                 | MMV_PLATE_A | F11                              | MMV274073 | D   | UC     | UC                 | MMV_PLATE_C                      | D05  | MMV007764 | P   | UC     | UC                 | MMV_PLATE_E | A09  |
| MMV007116                        | D   | UC     | UC                 | MMV_PLATE_A | G02                              | MMV018984 | D   | UC     | UC                 | MMV_PLATE_C                      | D06  | MMV665830 | P   | UC     | UC                 | MMV_PLATE_E | A10  |
| MMV007354                        | P   | UC     | UC                 | MMV_PLATE_A | G03                              | MMV000911 | D   | UC     | UC                 | MMV_PLATE_C                      | D07  | MMV665966 | P   | UC     | UC                 | MMV_PLATE_E | A11  |
| MMV020548                        | D   | UC     | UC                 | MMV_PLATE_A | G04                              | MMV007430 | D   | UC     | UC                 | MMV_PLATE_C                      | D08  | MMV396664 | P   | UC     | UC                 | MMV_PLATE_E | B02  |
| MMV019258                        | D   | UC     | UC                 | MMV_PLATE_A | G05                              | MMV007977 | D   | UC     | UC                 | MMV_PLATE_C                      | D09  | MMV001239 | P   | UC     | UC                 | MMV_PLATE_E | B03  |
| MMV007696                        | P   | UC     | UC                 | MMV_PLATE_A | G06                              | MMV020654 | D   | UC     | UC                 | MMV_PLATE_C                      | D10  | MMV667491 | P   | UC     | UC                 | MMV_PLATE_E | B04  |
| MMV011256                        | D   | UC     | UC                 | MMV_PLATE_A | G07                              | MMV665883 | D   | UC     | UC                 | MMV_PLATE_C                      | D11  | MMV006169 | P   | UC     | UC                 | MMV_PLATE_E | B05  |
| MMV666693                        | D   | UC     | UC                 | MMV_PLATE_A | G08                              | MMV084940 | D   | UC     | UC                 | MMV_PLATE_C                      | E02  | MMV086103 | P   | UC     | UC                 | MMV_PLATE_E | B06  |
| MMV008956                        | D   | UC     | UC                 | MMV_PLATE_A | G09                              | MMV396715 | D   | UC     | UC                 | MMV_PLATE_C                      | E03  | MMV008434 | P   | R      | UC                 | MMV_PLATE_E | B07  |
| MMV665827                        | P   | UC     | UC                 | MMV_PLATE_A | G10                              | MMV000963 | D   | UC     | UC                 | MMV_PLATE_C                      | E04  | MMV665892 | P   | UC     | UC                 | MMV_PLATE_E | B08  |
| MMV001038                        | D   | UC     | UC                 | MMV_PLATE_A | G11                              | MMV006319 | D   | UC     | UC                 | MMV_PLATE_C                      | E05  | MMV665836 | P   | R      | UC                 | MMV_PLATE_E | B09  |
| MMV007839                        | D   | R      | UC                 | MMV_PLATE_A | H02                              | MMV000972 | D   | UC     | UC                 | MMV_PLATE_C                      | E06  | MMV665881 | P   | UC     | UC                 | MMV_PLATE_E | B10  |
| MMV006662                        | D   | UC     | UC                 | MMV_PLATE_A | H03                              | MMV020490 | D   | UC     | UC                 | MMV_PLATE_C                      | E07  | MMV665875 | P   | UC     | UC                 | MMV_PLATE_E | B11  |
| MMV396678                        | P   | UC     | UC                 | MMV_PLATE_A | H04                              | MMV001318 | D   | UC     | UC                 | MMV_PLATE_C                      | E08  | MMV007020 | P   | UC     | UC                 | MMV_PLATE_E | C02  |
| MMV006861                        | P   | UC     | UC                 | MMV_PLATE_A | H05                              | MMV007978 | D   | UC     | UC                 | MMV_PLATE_C                      | E09  | MMV006566 | P   | UC     | UC                 | MMV_PLATE_E | C03  |
| MMV005457                        | P   | UC     | UC                 | MMV_PLATE_A | H06                              | MMV020660 | D   | UC     | UC                 | MMV_PLATE_C                      | E10  | MMV096126 | P   | UC     | UC                 | MMV_PLATE_E | C04  |
| MMV396693                        | P   | UC     | UC                 | MMV_PLATE_A | H07                              | MMV665904 | D   | UC     | UC                 | MMV_PLATE_C                      | E11  | MMV005522 | P   | UC     | UC                 | MMV_PLATE_E | C05  |
| MMV011567                        | D   | UC     | UC                 | MMV_PLATE_A | H08                              | MMV396632 | D   | UC     | UC                 | MMV_PLATE_C                      | F02  | MMV666686 | P   | UC     | UC                 | MMV_PLATE_E | C06  |
| MMV007907                        | D   | UC     | UC                 | MMV_PLATE_A | H09                              | MMV007875 | D   | UC     | UC                 | MMV_PLATE_C                      | F03  | MMV007474 | P   | UC     | UC                 | MMV_PLATE_E | C07  |
| MMV665805                        | D   | UC     | UC                 | MMV_PLATE_A | H10                              | MMV006820 | D   | UC     | UC                 | MMV_PLATE_C                      | F04  | MMV006962 | P   | UC     | UC                 | MMV_PLATE_E | C08  |
| MMV666021                        | P   | UC     | UC                 | MMV_PLATE_A | H11                              | MMV396749 | D   | UC     | UC                 | MMV_PLATE_C                      | F05  | MMV665813 | P   | UC     | UC                 | MMV_PLATE_E | C09  |
| MMV665800                        | D   | UC     | UC                 | MMV_PLATE_A | I02                              | MMV011576 | D   | UC     | UC                 | MMV_PLATE_C                      | F06  | MMV009304 | P   | UC     | UC                 | MMV_PLATE_E | C10  |
| MMV000634                        | UC  | UC     | UC                 | MMV_PLATE_A | I03                              | MMV020651 | D   | UC     | UC                 | MMV_PLATE_C                      | F07  | MMV019199 | P   | UC     | UC                 | MMV_PLATE_E | C11  |
| MMV666103                        | D   | UC     | UC                 | MMV_PLATE_A | I04                              | MMV000483 | D   | UC     | UC                 | MMV_PLATE_C                      | F08  | MMV396652 | P   | UC     | UC                 | MMV_PLATE_E |      |

**Figure S1: Primary screen of MMV400 using a multiplex aminopeptidase assay.** Enzyme activity that was reduced in comparison to control wells are indicated by “R” and compounds that had no effect on activity are shown as “UC” for unchanged. Compounds highlighted in grey are “drug-like” and the remainder are “probe-like”.
