# Supplementary material for: Screening the Medicines for Malaria Venture "Malaria Box" against the Plasmodium falciparum Aminopeptidases, M1, M17 and M18
Source: PubMed Central journal article supplement (PMC4336144; doi:10.1371/journal.pone.0115859), 2015-02-20
Supplement: pone.0115859.s003.pdf [file pone.0115859.s003.pdf]

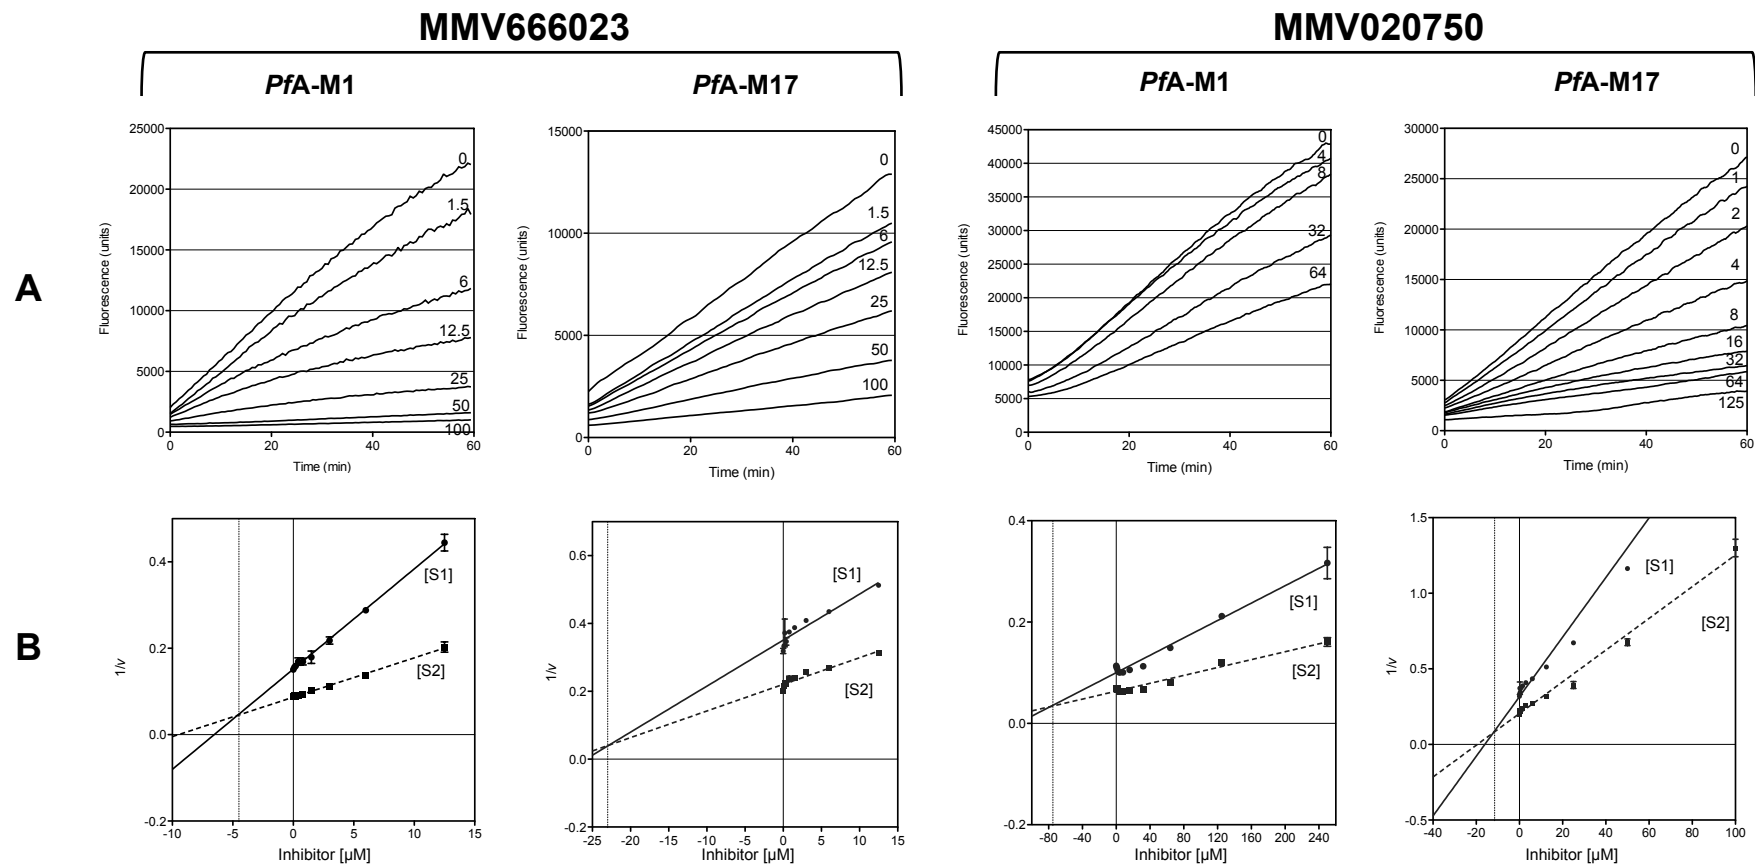

**Figure S3: Inhibitory properties of MMV666023 and MMV020750.** (A) Enzyme activity in the presence of increasing inhibitor concentration. Numbers shown on curves are inhibitor concentration in  $\mu\text{M}$ . (B) Dixon plot for calculation of  $K_i$  where [S1] and [S2] are two different substrate concentrations ( $\ll K_M$  of enzyme).
